1 Differential expression of an alternative splice variant of IL-12R $\beta$ 1 impacts early dissemination in the  
2 mouse and associates with disease outcome in both mouse and humans exposed to tuberculosis

3

4 Mrinal K. Das<sup>1</sup>, Aurelie A. Ray<sup>2\*1</sup>, Yi Cai<sup>3</sup>, Akul Singhania<sup>4</sup>, Christine M. Graham<sup>4</sup>, Mingfeng Liao<sup>2,5</sup>, Jeffrey  
5 J. Fountain<sup>2,2</sup>, John E. Pearl<sup>1</sup>, Manish Pareek<sup>1</sup>, Pranab Haldar<sup>1</sup>, Anne O'Garra<sup>4,6</sup>, Xinchun Chen<sup>3</sup>, Andrea  
6 M. Cooper<sup>1,6</sup>.

7

8 <sup>1</sup>Leicester Tuberculosis Research Group, Department of Infection, Immunity and Inflammation, University  
9 of Leicester, Leicester UK.

10 <sup>2\*1</sup> Trudeau Institute Inc. Saranac Lake, NY USA, now at Transgene SA, Illkirch Graffenstaden Cedex  
11 France.

12 <sup>2\*2</sup> Trudeau Institute Inc., now at Centers for Disease Control, Atlanta, USA.

13 <sup>3</sup> Department of Pathogen Biology, Shenzhen University School of Medicine, Shenzhen, China

14 <sup>4</sup> The Francis Crick Institute, London, UK

15 <sup>5</sup> Guangdong Key Lab for Diagnosis & Treatment of Emerging Infectious Diseases, Shenzhen Key Lab  
16 of Infection & Immunity, Shenzhen Third People's Hospital, jep , Shenzhen , China

17 <sup>6</sup> National Heart and Lung Institute, Imperial College London, London, United Kingdom

18 <sup>7</sup> Corresponding author: Andrea Cooper, Department of Infection, Immunity and Inflammation, University  
19 of Leicester, Leicester, LE1 7RH, UK.

20 Email: amc72@le.ac.uk

21

22 Keywords: Tuberculosis, IL-12R $\beta$ 1, alternative splice, transcriptional analysis, dissemination.

23

24

25 Grant support: **MKD** – Newton Fellowship; **AAR, JJF, JEP, AMC** were supported by Trudeau Institute,  
26 Inc. NIAID grant AI067723, The Royal Society to AMC; **AOG, CMG** and **AS** were funded by The Francis  
27 Crick Institute, (Crick 10126; Crick 10468), which receives its core funding from Cancer Research UK,  
28 the U.K. Medical Research Council, and the Wellcome Trust; and the sequencing project by the Bioaster  
29 Microbiology Technology Institute, Lyon, France; Medical Diagnostic Discovery Department, bioMérieux  
30 SA, Marcy l’Etoile, France; and funded in part by Illumina Inc., San Diego, CA, USA. AAR

31 **Abstract.** (244 words)

32 Experimental mouse models of TB suggest that early events in the lung impact immunity. Early events  
33 in the human lung in response to TB are difficult to probe and their impact on disease outcome is  
34 unknown. We have shown in mouse that a secreted alternatively-spliced variant of IL-12R $\beta$ 1, lacking the  
35 transmembrane domain and termed  $\Delta$ TM-IL-12R $\beta$ 1, promotes dendritic cell migration to the draining  
36 lymph node, augments T cell activation and limits dissemination of *M. tuberculosis* (Mtb). We show here  
37 that CBA/J and C3H/HeJ mice (both highly susceptible to Mtb) express higher levels of  $\Delta$ TM-IL-12R $\beta$ 1  
38 than resistant C57BL6 mice and limit early dissemination of Mtb from the lungs. Both CD11c<sup>+</sup> cells and  
39 T cells express  $\Delta$ TM-IL-12R $\beta$ 1 in humans, and mice unable to make  $\Delta$ TM-IL-12R $\beta$ 1 in either CD4 or  
40 CD11c expressing cells permit early dissemination from the lung. Analysis of publically available blood  
41 transcriptomes indicates that pulmonary TB is associated with high  $\Delta$ TM-IL-12R $\beta$ 1 expression and that  
42 of all IL-12 related signals, the  $\Delta$ TM-IL-12R $\beta$ 1 signal best predicts active disease.  $\Delta$ TM-IL-12R $\beta$ 1  
43 expression reflects the heterogeneity of latent TB infection and has the capacity to discriminate between  
44 latent and active disease. In a new Chinese TB patient cohort,  $\Delta$ TM-IL-12R $\beta$ 1 effectively differentiates  
45 TB from latent TB, healthy controls and pneumonia patients. Finally,  $\Delta$ TM-IL-12R $\beta$ 1 expression drops in  
46 drug-treated individuals in the UK and China where infection pressure is low. We propose that  $\Delta$ TM-IL-  
47 12R $\beta$ 1 regulates early dissemination from the lung and that it has diagnostic potential and provides  
48 mechanistic insights into human TB.

49

## 50    **Introduction**

51    Tuberculosis (TB) remains a critical worldwide health issue despite significant public health and research  
52    efforts<sup>1</sup>. Key elements in our failure to limit this disease are the large number of people infected with the  
53    bacterium, *Mycobacterium tuberculosis* (Mtb) which causes disease, the lack of an effective vaccine  
54    against pulmonary TB and the need for prolonged and multiple drug treatments<sup>2</sup>. A critical gap in  
55    knowledge is what separates those that develop disease from the majority of infected individuals who  
56    control the infection without consequences<sup>3</sup>. Mendelian susceptibility to mycobacterial disease (MSMD)  
57    provides some insight, as those lacking the ability to generate or respond to interferon (IFN)- $\gamma$  have a  
58    significantly increased risk of mycobacterial disease including TB<sup>4</sup>. A key component identified by MSMD  
59    and one known to exacerbate severity of TB is genetic dysfunction of the Interleukin (IL)-12 receptor  
60    component IL-12R $\beta$ 1<sup>4,5</sup>, which acts with IL-12R $\beta$ 2 or IL-23R to mediate signaling by IL-12p70 or IL-23  
61    respectively<sup>6</sup>. Understanding how the IL-12 receptor complex contributes to protection and disease is  
62    therefore critical. While the major function of this receptor complex is to promote IFN- $\gamma$  production and  
63    consequent macrophage activation<sup>4,6</sup>, we have identified a novel role for IL-12p40 and IL-12R $\beta$ 1 in  
64    initiation of early events within the lung following low dose aerosol exposure to Mtb<sup>7,8</sup>.

65    Experimental mouse models of aerosol exposure to Mtb indicate that the rapidity of bacterial  
66    dissemination and early activation of T cells in the draining lymph node and spleen contribute to effective  
67    control of lung infection<sup>9,10,11</sup>. Specifically, slow dissemination of bacteria leads to delayed T cell  
68    activation and delayed recruitment of these T cells<sup>12</sup>. This delay results in T cells arriving at the infected  
69    foci after the inflammatory response to the bacteria has begun and where the inflamed environment limits  
70    the efficacy of the T cell response in situ<sup>10,13</sup>. We have shown that the cytokine IL-12p40 is expressed  
71    early following Mtb exposure<sup>8</sup> and that if dendritic cells do not express IL-12p40 then they do not become  
72    motile when exposed to Mtb, do not migrate from the lung to the draining lymph node and do not drive  
73    naive T cell activation<sup>7</sup>. Dendritic cells in the lungs of Mtb-exposed mice produce not only IL-12p40 but  
74    also an alternative splice variant of IL-12R $\beta$ 1 which lacks the transmembrane domain and which we have  
75    called  $\Delta$ TM-IL-12R $\beta$ 1<sup>8</sup>. This splice variant was identified when the receptor was first described<sup>14</sup> however

76 its function was not appreciated until our studies in Mtb<sup>8, 15</sup>. The  $\Delta$ TM-IL-12R $\beta$ 1 locates to the  
77 endoplasmic reticulum<sup>16</sup> and can be secreted by transfected cells and mitogen-activated T cells blasts<sup>15</sup>.  
78 Human cells produce a similar splice variant of the IL12RB1 gene in response to Mtb exposure and this  
79 is referred to as isoform 2<sup>8, 17</sup> and has been shown to augment human T cell responsiveness to IL-  
80 12p70<sup>18</sup>. Our data supports the hypothesis that the alternative splice variant of IL-12R $\beta$ 1 plays an early  
81 role in initiation of T cell activation in response to aerosol infection with Mtb and that the production of  
82 this splice variant in human TB merits investigation.

83 We have used meta-analysis of public data sets with statistical analysis to combine results from  
84 independent but related studies to identify factors potentially contributing to human disease<sup>19</sup>. Meta-  
85 analysis of gene expression data in particular can provide support for further investigation of any one  
86 particular pathway by targeted differential expression analysis<sup>20</sup>, analysis of relative expression of gene  
87 in various tissues and cells<sup>21</sup> and pathway analysis<sup>22</sup>. Multiple transcriptomic profiles of TB patients and  
88 controls have been deposited for analysis<sup>23</sup>. These data sets are available from areas of the world where  
89 the chance of infection (or infection pressure) varies due to the incident rate of disease; thus South Africa  
90 has a high incidence of TB at 781/100,000 and thus has high infection pressure, China has moderate  
91 incidence at 65/100,000 (modest infection pressure) and the UK has an overall low incidence  
92 (10/100,000) with some higher areas in London and the Midlands but at best only a low infection  
93 pressure<sup>1</sup>. This variety in the source of transcriptomic data sets allows for global insight into how specific  
94 gene expression profiles are associated with disease and also allows infection pressure to be considered  
95 as a factor in this association. Importantly for our study, while the commercially available arrays have  
96 probes sets specific for IL12RB1 these sets contain probes uniquely specific for either the full length or  
97 the alternatively spliced isoform. Combining the signal for the full and the alternatively spliced isoform  
98 into one signal for IL12RB1 obfuscates which isoform is expressed and therefore manual curation is  
99 required in order to differentiate these signals.

100 To address the potential role of the alternative splice variant of IL-12R $\beta$ 1 in TB we have combined mouse  
101 mechanistic studies with analysis of both published and novel transcriptomic profiles. We have found that

102 high expression of  $\Delta$ TM-IL-12R $\beta$ 1 in the lungs of mice susceptible to Mtb results in very limited early  
103 dissemination of bacteria from the lung to the periphery. Furthermore, mice lacking the ability to make  
104 the  $\Delta$ TM-IL-12R $\beta$ 1 in either CD11c<sup>+</sup> or CD4<sup>+</sup> expressing cells are compromised in their ability to limit  
105 dissemination to the periphery. Taken together these data implicate early expression of the  $\Delta$ TM-IL-  
106 12R $\beta$ 1 as a factor in control of Mtb dissemination from the lung to the periphery. To determine if the  
107 human  $\Delta$ TM-IL-12R $\beta$ 1 or isoform 2 is associated with infection and disease in areas of low and high  
108 infection pressure we analyzed expression of the  $\Delta$ TM-IL-12R $\beta$ 1 specific probes in transcription data sets  
109 from around the world. We found that expression of  $\Delta$ TM-IL-12R $\beta$ 1 in the blood is associated with active  
110 pulmonary TB and that it reflects the heterogeneity of the latently infected population.

111

## 112 **Materials and methods**

113 *Subjects and clinical sample collection.* Protocols were approved by the Institutional Review Board of  
114 Shenzhen Third People's Hospital, Shenzhen, China and informed consent was obtained from all  
115 participants. Whole blood samples were collected from healthy controls (HC, n=20), individuals with latent  
116 tuberculosis infection (LTBI, n=20), patients with active tuberculosis (TB, n=20) and patients with  
117 pneumonia (n=20) at Shenzhen Third People's Hospital.

118 Patients with TB were diagnosed based on clinical symptoms, chest radiography, positive sputum Mtb  
119 culture and positive response to anti-TB chemotherapy. Asymptomatic individuals with non-clinical  
120 disease were recruited as controls. Mtb specific IGRAs were used to differentiate individuals with LTBI  
121 from HCs without infection<sup>24</sup>. The diagnosis of pneumonia was based on 1) lavage fluid or sputum  
122 cultures were Mtb-negative during clinical follow-up, 2) new infiltration and clinical signs on chest  
123 radiograph were evident and completely resolved after treatment with the appropriate antibiotics, and 3)  
124 viral pathogens were not detected. The demographic characteristics of study populations of this study  
125 are in Table 1.

126 *Mice* C57BL/6J, C3H/HeJ and CBA/J mice were purchased from JAX mice and housed at Trudeau  
127 Institute, Inc. B6.Cg-Tg(CD4-Cre) and B6.Cg-Tg(Ilgax-cre) mice were purchased from Jax and crossed

128 with our transgenic mice, which upon FLP and CRE recombination excise introns 13 and 14 of the *il12rb1*  
129 gene<sup>15</sup>. Confirmation of excision was undertaken with PCR in each case.

130 *Infection* Mtb strain H37Rv was grown in Proskauer Beck medium containing 0.05% Tween 80 to mid-  
131 log phase and frozen at  $-70^{\circ}\text{C}$ . Mice were infected with a low dose of bacteria ( $\sim 75$  CFU) using a Glas-  
132 Col airborne infection system as previously described<sup>25</sup>. At day 1 and day 15 post-challenge, mice were  
133 killed by CO<sub>2</sub> asphyxiation, the organs were aseptically excised and individually homogenized in saline.  
134 Organ homogenates were subsequently plated on nutrient 7H11 agar (BD Biosciences) for 3 weeks at  
135  $37^{\circ}\text{C}$ , at which point CFU were counted.

136 *Quantitative PCR*. RNA was generated from mouse tissue or human cells using the RNAeasy kit and  
137 was reverse transcribed with an RT Kit from Life technologies – now ThermoFisher Scientific). RT-PCR  
138 was performed to generate Ct values which were normalized to the housekeeping gene signal and then  
139 applied to a standard curve to determine copy number for each isoform of human and mouse IL-12R $\beta$ 1  
140 transcript generated from a specific template<sup>26</sup>.

141 *Human monocyte derived dendritic cells*. Discarded filters from blood donor clinic were harvested for  
142 peripheral blood cells and the CD14+ cells were purified using magnetic beads (Miltenyi). CD14+ cells  
143 were seeded at  $2 \times 10^6$ /ml into wells in RPMI containing 10% FCS and stimulated with 4000IU/ml GM-CSF  
144 and 1000IU/ml IL-4 (both cytokines from Peprotech). Media was refreshed at 3 days and the cells were  
145 used for experiments at day 5.

146 *Microarray data from publically available databases*. To evaluate gene expression of  $\Delta\text{TM-IL-12R}\beta 1$  in  
147 TB, we used the transcriptome–microarray datasets available in public repositories. Briefly, public  
148 databases of Gene Expression Omnibus (<http://www.ncbi.nlm.nih.gov/geo>) and ArrayExpress  
149 (<https://www.ebi.ac.uk/arrayexpress>) were searched with the keywords ‘Tuberculosis, Patients’. A total  
150 of 59 data series (58 in GEO and 19 in ArrayExpress – with 16 overlapping) were retrieved from the  
151 search. We used the following exclusion criteria:- samples other than blood or blood derived cells, array  
152 platform lacking specific probe for  $\Delta\text{TM-IL-12R}\beta 1$ , series lacking non-comorbid TB conditions, lacking  
153 adult TB subjects, with less than 3 replicated samples for one condition and repeat arrays, we identified

154 16 arrays for further analysis. Full texts of the associated articles were evaluated for details on patient  
155 selection, demographics, sampling and RNA analysis. Six out of 16 were further excluded as the median  
156 centered across samples was not zero<sup>27</sup> and final analysis was carried out on 10 datasets (Table 2).

157 *Processing of microarray dataset.* Out of 10 data sets, 7 were generated on Illumina and 3 were on the  
158 Affymetrix platform (Table 2). All 3 Affymetrix data series were generated on the same platform. The raw  
159 .cel files were converted to expression values using GC-RMA package read by 'affy' package on  
160 Bioconductor<sup>21</sup>. Associated packages and libraries used were "hgu133plus2.db", "hgu133plus2cdf". R-  
161 studio version-1.0.143.0 using Bioconductor libraries and R statistical packages were used for data  
162 analysis. Processed data matrices were exported into tab delimited txt files.

163 For Illumina data series matrix, those including non-log transformed and normalized data were analyzed  
164 using 'GEOquery' and 'lumi' package<sup>28, 29</sup>. For datasets having transformed and normalized values in  
165 series matrix, raw (non-normalized data) data files were downloaded from the GEO\_supplementary files  
166 followed by processing using 'lumi' package. Briefly, data sets were processed, background corrected,  
167 log-2 transformed and then normalized using 'quantile' method. The processed data file was saved as  
168 tab delimited .txt file.

169 *RNA-seq data analysis.* Raw paired-end RNA-seq data from Singhanian et al.<sup>30</sup> for the Berry London  
170 cohort<sup>31</sup> was subjected to quality control using FastQC (Babraham Bioinformatics) and MultiQC<sup>32</sup>.  
171 Trimmomatic v0.36 was used to remove adapters and filter raw reads below the 36 bases long and  
172 leading and trailing bases below quality 25<sup>33</sup>. Paired filtered reads from Trimmomatic were aligned to the  
173 *Homo sapiens* genome Ensembl GRCh38 (release 86) using HISAT2 v2.0.4 with default settings and RF  
174 rna-strandedness<sup>34</sup>. Gene transcripts representing multiple splice variants for each gene locus were  
175 assembled using StringTie v1.3.3 with default settings, using the -eB and stranded library fr-secondstrand  
176 parameters, and the reference genome mentioned above<sup>35</sup>. The assembled transcriptomes were  
177 annotated and analyzed using the *bioconductor* package Ballgown<sup>36</sup> in R to obtain fragments per kilobase  
178 of transcript per million reads sequenced (FPKM) values<sup>36</sup>.



179 *QuantiGene RNA analysis* Whole blood was collected directly into PAXgene Blood RNA tubes (BD  
180 Biosciences) from individuals classified as HC, LTBI, TB and pneumonia in Shenzhen's Third People's  
181 Hospital, China (Table 1). Total RNA was extracted using the PAXgene Blood RNA Kit (Qiagen) following  
182 the manufacturer's instructions. The purified RNA samples were processed and run on a custom  
183 Panomics QuantiGene 2.0 Multiplex array (Affymetrix) plate by the Shanghai Biotechnology Corporation  
184 (China, Shanghai). This plate was designed by the manufacturer with probes to simultaneously detect 31  
185 target genes including IL12RB1. Gene expression was normalized to Housekeeping genes transcripts  
186 following the manufacturer's protocol (<http://www.panomics.com>).

187 *Statistical analysis.* Differences between the means of experimental groups were analyzed using the two  
188 tailed Student's *t*-test or ANOVA as appropriate. Paired *t* tests were used for the longitudinal data.  
189 Differences were considered significant where  $P \leq 0.05$ . Inherently logarithmic data was transformed for  
190 statistical analysis. Where bacterial numbers were below the limit of detection the samples were given  
191 the value of the limit of detection to allow analysis. Pearson correlation was used to assess interaction  
192 between probes within a dataset. Briefly lumi/GC-RMA processed intensity data were used to prepare a  
193 functional data matrix with selected variables, this data matrix was assessed in the 'Statistical Module'  
194 of the Metaboanalyst 3.0 online tool to calculate the Pearson Correlation Coefficient<sup>37</sup>. Similarly, a  
195 modified data matrix with downselected variables was used for Receiver Operating Characteristic (ROC)  
196 curve analysis. The analysis was carried out in 'Biomarker Analysis' module of MetaboAnalyst 3.0 online  
197 tool<sup>37</sup>. Classical univariate ROC curve analysis was used for calculation of the area under curve (AUC).

198

## 199 **Results**

200 *Expression of  $\Delta$ TM-IL-12R $\beta$ 1 in the lung associates with reduced dissemination of Mtb from the lung to*  
201 *the periphery.* We knew from our previous studies that the  $\Delta$ TM-IL-12R $\beta$ 1 message was induced early in  
202 the lungs of C57BL/6J (B6) mice exposed to low dose aerosol infection<sup>8</sup>. We also knew that the global  
203 inability to make the  $\Delta$ TM-IL-12R $\beta$ 1 resulted in increased dissemination of bacteria to the periphery and  
204 reduced ability to generate IFN- $\gamma$  producing T cells<sup>15, 18</sup>. We wanted to determine whether this observation

205 was unique to the resistant B6 strain of mouse or if there was differential expression in mice which are  
206 substantially more susceptible to the low dose aerosol challenge<sup>38</sup>. To achieve this we infected resistant  
207 B6 and susceptible CBA/J (CBA) and C3H/HeJ (C3H) mice in the same aerosol chamber and determined  
208 bacterial burden (Fig 1 A) and expression of the full length and  $\Delta$ TM-IL-12R $\beta$ 1 (Fig 1B) at day 15 post  
209 infection. We found that while the bacterial burden in the lung was not markedly dissimilar between the  
210 strains of mice at this time point there was a much greater range of dissemination to the mediastinal  
211 lymph node (MLN) and that there was no detectable dissemination to the spleen or liver in the C3H and  
212 CBA mice (Fig 1A). When we measured the copy number of both full length and  $\Delta$ TM-IL-12R $\beta$ 1 mRNA  
213 by quantitative RT-PCR we found that while all three strains expressed a small but measurable amount  
214 of full length mRNA, the C3H and CBA mice made a much greater amount of  $\Delta$ TM-IL-12R $\beta$ 1 in their  
215 lungs than did the B6. While there was modest induction of the  $\Delta$ TM-IL-12R $\beta$ 1, the baseline level of  
216 mRNA for  $\Delta$ TM-IL-12R $\beta$ 1 was already high in both the CBA and C3H suggesting that expression may be  
217 regulated by a homeostatic factor unrelated to Mtb infection. Regardless of the mechanism that drives  
218 baseline induction of  $\Delta$ TM-IL-12R $\beta$ 1, it is clear that a high level of expression is associated with reduced  
219 dissemination of bacteria from the lung to the periphery.

220 *Expression of  $\Delta$ TM-IL-12R $\beta$ 1 can be induced in human dendritic cells and is impacted by TB in myeloid*  
221 *cells and lymphocytes in blood.* Having identified an association between high level expression of  $\Delta$ TM-  
222 IL-12R $\beta$ 1 and reduced dissemination in mice with increased susceptibility to TB we wanted to determine  
223 expression of  $\Delta$ TM-IL-12R $\beta$ 1 in specific cells in humans with and without TB. In a first study we extended  
224 our observation that human monocyte-derived dendritic cells express  $\Delta$ TM-IL-12R $\beta$ 1 in response to Mtb<sup>8</sup>  
225 by determining the kinetics of the response to live Mtb exposure in monocyte-derived dendritic cells from  
226 several anonymous blood donors. By measuring the copy number of full length and  $\Delta$ TM-IL-12R $\beta$ 1  
227 mRNA using quantitative RT-PCR we were able to generate a ratio between the two signals and compare  
228 the response of individual donors. We found that donors made a strong  $\Delta$ TM-IL-12R $\beta$ 1 response between  
229 3 and 6 hours which waned by 9 hours (Fig 2 A). These data suggest that Mtb drives an acute but not  
230 prolonged expression of  $\Delta$ TM-IL-12R $\beta$ 1 in this cell type. We also probed the gene-expression array data

231 in monocytes, neutrophils and lymphocytes that had been isolated from the blood of healthy control and  
232 those with active pulmonary TB<sup>31</sup>. We found that the signal from the probe specific for the  $\Delta$ TM-IL-12R $\beta$ 1  
233 was more highly expressed in monocytes and neutrophils from TB patients relative to controls (Fig 2 B)  
234 and that while the CD4 and CD8 T cell signals independently failed to achieve the statistical threshold for  
235 significance, when the data sets were combined and analyzed as T lymphocytes, they were significantly  
236 different (average log2 intensity: PTB 8.145 $\pm$ 0.10, n=14 versus HC 7.72 $\pm$ 0.16, n=8; P=0.0294). These  
237 data indicate that exposure to Mtb and active TB induces expression of  $\Delta$ TM-IL-12R $\beta$ 1 in human cells of  
238 both myeloid and lymphoid origin.

239 *Inability of either CD11c or CD4 expressing cells to produce  $\Delta$ TM-IL-12R $\beta$ 1 results in increased*  
240 *dissemination of Mtb from the lung to the periphery following aerosol infection. We see expression of the*  
241  *$\Delta$ TM-IL-12R $\beta$ 1 in both myeloid and lymphoid cells in blood from TB patients (Fig 2B) and we know that*  
242 *a global inability to make  $\Delta$ TM-IL-12R $\beta$ 1 reduces control of dissemination<sup>15</sup> while high expression is*  
243 *associated with inhibition of dissemination of Mtb (Fig 1). We wanted therefore to determine whether*  
244 *myeloid or lymphoid cell expression of  $\Delta$ TM-IL-12R $\beta$ 1 is responsible for the control of dissemination of*  
245 *bacteria from the lung to the periphery. To do this we crossed our transgenic mouse, which excises exons*  
246 *13 and 14 in a FLP/CRE dependent manner resulting in expression of the full length IL-12R $\beta$ 1 without*  
247 *the structure to splice the  $\Delta$ TM-IL-12R $\beta$ 1<sup>15</sup> to mice expressing Cre under the CD11c or CD4 promoter.*  
248 *We infected the mice via aerosol and determined bacterial burden in the lungs and periphery at day 15*  
249 *post infection (Fig 2C). We found that while the bacterial burden in the lung was not affected by cell*  
250 *specific loss of  $\Delta$ TM-IL-12R $\beta$ 1 expression, there was a significant increase in the bacterial burden in the*  
251 *liver of mice lacking  $\Delta$ TM-IL-12R $\beta$ 1 in both CD11c and CD4 expressing cells (Fig 2C). While the mean*  
252 *number of bacteria in the MLN was not significantly different, the range of bacterial numbers was much*  
253 *increased for the mice lacking  $\Delta$ TM-IL-12R $\beta$ 1 in both CD11c- and CD4-expressing cells. Further, while*  
254 *significance was seen for increased dissemination to the spleen in mice lacking  $\Delta$ TM-IL-12R $\beta$ 1 in CD4-*  
255 *expressing cells, there was a trend to increased dissemination in the mice where  $\Delta$ TM-IL-12R $\beta$ 1 was*  
256 *deleted in CD11c<sup>+</sup> cells. These data support the hypothesis that cells of both the lymphoid and myeloid*

257 lineage produce  $\Delta$ TM-IL-12R $\beta$ 1 in response to infection and that while the lymphoid compartment seems  
258 to mediate the strongest effect, there is a measurable role for myeloid-derived  $\Delta$ TM-IL-12R $\beta$ 1 in TB  
259 control. In preliminary data we find that absence of  $\Delta$ TM-IL-12R $\beta$ 1 in CD11c expressing cells results in  
260 disruption of cytokine balance in the lung resulting in more IL-12p40 and more IL-10 (data not shown).  
261 *Meta-analysis of transcriptomic data reveals an association between PTB and expression of the  $\Delta$ TM-IL-*  
262 *12R $\beta$ 1 in human blood.* We observe that Mtb induces  $\Delta$ TM-IL-12R $\beta$ 1 expression in human cells (Fig 2A)  
263 and that purified cells from the blood of TB patients express  $\Delta$ TM-IL-12R $\beta$ 1 (Fig 2B). We also observe  
264 an association between  $\Delta$ TM-IL-12R $\beta$ 1 expression and dissemination from the lung to the periphery in  
265 the experimental mouse model (Fig 1 and Fig 2C). Together the data support analysis of  $\Delta$ TM-IL-12R $\beta$ 1  
266 expression in human disease. To achieve this we used defined criteria to select publically available array  
267 data sets and obtained 10 data sets from 5 countries, 3 continents and 4 platforms (Table 2)<sup>24, 31, 39, 40, 41</sup>.  
268 In both Illumina and Affymetrix array platforms there are 3 probes representing detection of IL12RB1  
269 transcription, one of which is specific for the full length transcript, one specific for the  $\Delta$ TM-IL-12R $\beta$ 1 and  
270 one that can detect both. To determine what each of the probes contributes to the observed total  
271 IL12RB1 signal, we analyzed the raw data for each probe in 4 array data sets (Fig 3). This analysis  
272 revealed that for more than 90% of the samples, the signal from the probe specific for the full length IL-  
273 12R $\beta$ 1 transcript is negligible (i.e. the raw probe signal is insignificant) (Fig 3, FL-IL12R $\beta$ 1) while the  
274 signal for  $\Delta$ TM-IL-12R $\beta$ 1 is detectable in almost all samples (Fig 3,  $\Delta$ TM-IL-12R $\beta$ 1). The intensity of the  
275 signal for the probe specific for  $\Delta$ TM-IL-12R $\beta$ 1 is highly correlated with the signal from the probe which  
276 detects both the full length and  $\Delta$ TM-IL-12R $\beta$ 1 transcripts, while the signal for the probe specific for the  
277 full length transcript correlates with both signals to a much lower degree (Table 3). These analyses  
278 suggest that blood cells express the  $\Delta$ TM-IL-12R $\beta$ 1 transcript in significant amounts and that this  
279 transcript is the dominant one.  
280 *Higher expression of the  $\Delta$ TM-IL-12R $\beta$ 1 transcript correlates with pulmonary TB.* We see a specific signal  
281 for  $\Delta$ TM-IL-12R $\beta$ 1 in transcriptional data sets from human blood (Fig 3) and we know that this molecule  
282 is associated with altered disease outcomes in the experimental mouse model (Fig 1 and 2). These

283 observations support an in depth analysis of the transcriptional data sets from individuals with pulmonary  
284 TB and their controls. To achieve this we processed, transformed and normalized the raw data from the  
285 transcriptional arrays identified in Table 2 and compared the signal to the sample groups defined by the  
286 investigators originating the data sets. The signal for the probe specific for  $\Delta$ TM-IL-12R $\beta$ 1 significantly  
287 differentiated PTB and control groups in all arrays tested in the UK<sup>31</sup>, China<sup>24</sup>, Indonesia<sup>40</sup>, Malawi<sup>39</sup> and  
288 South Africa<sup>39</sup> (Figure 4A). One data set in South Africa showed a trend but did not quite make  
289 significance (GSE19442)<sup>31</sup> and the data in Indonesia<sup>40</sup> had a very small difference as might be expected  
290 as the only difference between the groups was the absence of active symptoms for TB (i.e. non TB rather  
291 than healthy control). Despite the small difference the data was not variable and thus reached  
292 significance statistically. These data demonstrate that  $\Delta$ TM-IL-12R $\beta$ 1 expression in the blood is  
293 associated with active pulmonary TB.

294 *Expression of the splice variant in the blood reflects the heterogeneity of latent TB infection.* While the  
295  $\Delta$ TM-IL-12R $\beta$ 1 transcript clearly associates with pulmonary TB (PTB), it is variably able to discriminate  
296 between latent TB infection (LTB) and PTB (Fig 4A) with 3 of 7 studies showing discrimination but no  
297 association with location. One study showed very clear discrimination (China GSE 54992)<sup>24</sup> and this may  
298 reflect the fact that this resulted from isolated PBMC rather than whole blood or may just reflect the  
299 difference in the platform. These data suggest that the  $\Delta$ TM-IL-12R $\beta$ 1 may have the capacity to  
300 discriminate between LTB and PTB but work needs to be done to improve the signal. Within the three  
301 studies which showed the ability to discriminate between LTB and PTB we investigated whether the  $\Delta$ TM-  
302 IL-12R $\beta$ 1 signal was the strongest IL-12-related signal capable of discriminating between infection  
303 outcomes. To do this we generated a data matrix using array signals from IL12A, IL12B, IL12RB1 and  
304 IL-12RB2 as well as ratios of each set of signals as variables to see how well they differentiated between  
305 groups. The top three performing variables based on area under the curve (AUC) or receiver operating  
306 characteristic (ROC) curve capable of discriminating between control and PTB, LTB and PTB and LTB  
307 and control are shown in Table 4. The signal for  $\Delta$ TM-IL-12R $\beta$ 1 either alone or as a ratio with other  
308 members of the IL-12 family appears in the top three for all three arrays and for all three discriminatory

309 activities. These analyses demonstrate that the  $\Delta$ TM-IL-12R $\beta$ 1 signal has the potential to be a diagnostic  
310 tool and should be studied further.

311 To extend our analysis of array data we analyzed RNA-Seq data generated from the RNA used in the  
312 GSE19444 UK<sup>31,30</sup> for transcription of  $\Delta$ TM-IL-12R $\beta$ 1 and found that as for array data, the  $\Delta$ TM-IL-12R $\beta$ 1  
313 signal discriminates between PTB and controls, the  $\Delta$ TM-IL-12R $\beta$ 1 signal also discriminates between  
314 LTB and controls (Fig 4B). Importantly, we identify those samples identified as outliers in previous  
315 analyses<sup>31,30</sup> by open circles (Fig 4B) which show low expression of  $\Delta$ TM-IL-12R $\beta$ 1 in the PTB outliers  
316 and high expression in 3 of 5 in the LTB outliers suggesting that the  $\Delta$ TM-IL-12R $\beta$ 1 signal may be  
317 associated with the discriminatory gene-signature identified previously<sup>31,30</sup>.

318 Finally, we wanted to test the predictive and discriminatory power of the  $\Delta$ TM-IL-12R $\beta$ 1 signal in a test  
319 patient cohort in China. To do this we probed the RNA from whole human blood using a targeted array  
320 capable of measuring the IL-12R $\beta$ 1 signal. We found that while the LTB cohort had a more variable signal  
321 than the controls, there was no significant difference between the means for these two populations and  
322 the IL-12R $\beta$ 1-specific signal discriminated effectively between control and PTB, LTB and PTB, PTB and  
323 pneumonia (Fig 4C). These data further support the utility of the  $\Delta$ TM-IL-12R $\beta$ 1 signal to discriminate  
324 between PTB and LTB and PTB and other diseases.

325 *The  $\Delta$ TM-IL-12R $\beta$ 1 signal decreases upon treatment in areas of low infection pressure.* Because we see  
326 a difference in the  $\Delta$ TM-IL-12R $\beta$ 1 signal between controls and PTB we reasoned that the  $\Delta$ TM-IL-12R $\beta$ 1  
327 may provide a signal indicating that treatment is effective. To determine if this was the case, we analyzed  
328 the transcriptome sets containing data from treated individuals from areas of low infection pressure (UK,  
329 overall incidence rate 10/100,000 – but with pockets of moderate infection pressure), moderate infection  
330 pressure (China, incidence rate 64/100,000) and high infection pressure (South Africa, incidence rate  
331 781/100,000). We found that in the UK and China an early (8-12 weeks) drop in the  $\Delta$ TM-IL-12R $\beta$ 1  
332 signal was seen during treatment, which was sustained long term (Fig 5, top graphs). In contrast, in two  
333 studies in South Africa no sustainable or reproducible drop in signal was seen over the population during  
334 treatment (Fig 5, bottom graphs). These data suggest that the signal for  $\Delta$ TM-IL-12R $\beta$ 1 may be useful to

335 detect treatment success in situations where the risk of reinfection is low, but it may reflect repeated  
336 infection where reinfection risk is high. Determining when and how the  $\Delta$ TM-IL-12R $\beta$ 1 is expressed in  
337 the lungs of those recently exposed to TB is therefore an important undertaking.

338

### 339 **Discussion**

340 We show here that the  $\Delta$ TM-IL-12R $\beta$ 1 is a significant indicator of active TB in human populations across  
341 the globe, that it can discriminate between latent and active TB under some conditions and that it drops  
342 during drug treatment in areas where the risk of reinfection is low. These observations are valuable and  
343 suggest that this gene transcription signal can contribute to the development of sensitive and specific  
344 modular transcriptional signatures<sup>30</sup> capable of defining the risk of TB development in those infected with  
345 the bacterium. The goal for these signatures is to eventually turn the marked heterogeneity of latent  
346 infection from a black box into a fully defined continuum with distinct transcriptional markers capable of  
347 allotting individuals into low, mid and high risk of progression. In addition to this goal however the data  
348 we report here also highlight the potential for the  $\Delta$ TM-IL-12R $\beta$ 1 signal to inform us about the  
349 mechanisms underlying the development and control of TB in the human lung.

350 In considering the early events in the TB-exposed lung, the invading bacteria is unlikely to meet any  
351 activated macrophages or T cells when it first arrives and thus for the acquired immune response to be  
352 initiated, the bacteria must migrate to the draining lymph node<sup>12</sup>. This migration is slow to occur and this  
353 delay in activation and arrival of T cells allows the bacteria to grow unrestrained for up to 2 weeks in the  
354 B6 mouse<sup>9, 42</sup>. Cytokines and chemokines capable of initiating early responses are therefore key to the  
355 rapidity of the response and to eventual outcome<sup>43</sup>. We know that IL-12p40 is expressed very early  
356 following Mtb infection and that its production precedes production of IL-23 or IL-12p35 suggesting that  
357 it functions alone<sup>7, 8</sup>. We also know that type 1 IFN, IL-1, IL-10 and IL-12 cross regulate each other in  
358 response to Mtb infection both in vitro and in vivo<sup>7, 44, 45, 46</sup> and that the relative level of these cytokines  
359 at the initiation of infection has the potential to impact the initiation of immunity. Our data reported here  
360 suggest that the very high expression of the  $\Delta$ TM-IL-12R $\beta$ 1 in the C3H and CBA mice may sequester IL-

361 12p40, which we know aids in overcoming the IL-10-induced resistance to migration in Mtb-exposed  
362 dendritic cells <sup>7</sup>. This inhibition may then severely limits the migration of bacteria from the lung to the  
363 periphery – as is seen in the CBA/J and C3H mice. In turn this delay then results in slow induction of T  
364 cells thus leading to the observed higher susceptibility of these mice strains to Mtb <sup>38</sup>. In contrast, total  
365 lack of the splice variant results in slightly higher dissemination of bacteria from the lung <sup>15</sup> and this effect  
366 can be seen if either myeloid or lymphoid cells lack the  $\Delta$ TM-IL-12R $\beta$ 1. The increased effect of the  
367 absence of the  $\Delta$ TM-IL-12R $\beta$ 1 in CD4 cells may reflect the role of the  $\Delta$ TM-IL-12R $\beta$ 1 in augmenting IL-  
368 12p70-induced IFN- $\gamma$  production in T cells<sup>15, 18</sup>, while the impact of the loss of  $\Delta$ TM-IL-12R $\beta$ 1 in the CD11c  
369 expressing cells may reflect the disruption of protective cytokine balance at the beginning of infection.  
370 The very early but short lived  $\Delta$ TM-IL-12R $\beta$ 1 response of the human dendritic cells to live Mtb infection  
371 suggests that the signal is highly regulated and that sustained expression in myeloid cells may reflect  
372 ongoing exposure to live bacteria. In this regard, our data showing increased expression of  $\Delta$ TM-IL-  
373 12R $\beta$ 1 signal in the blood of active TB patients suggests that myeloid cells expressing this signature may  
374 have been exposed to live bacteria in the recent past. Similarly, the drop in  $\Delta$ TM-IL-12R $\beta$ 1 signal seen  
375 during drug treatment may reflect removal of live bacteria from the body and therefore the loss of  
376 stimulation for the signal. If one considers the infection pressure in the areas where the  $\Delta$ TM-IL-12R $\beta$ 1  
377 signal drops following drug treatment, it is possible that there is little re-exposure to drive the signal up  
378 again but in areas where re-infection is likely there will be repeated exposures in the lung and the  $\Delta$ TM-  
379 IL-12R $\beta$ 1 will be maintained despite drug treatment.

380 IL-12R $\beta$ 1 exhibits a marked degree of variability at the genomic<sup>5</sup>, transcriptional<sup>47</sup> and splice variant  
381 level<sup>17</sup> suggesting that it is a highly flexible receptor with the capacity to both stimulate and inhibit cellular  
382 responses. Our observation that  $\Delta$ TM-IL-12R $\beta$ 1 is secreted<sup>15</sup> suggests that it acts to sequester cytokine  
383 and regulate activation of cells however it appears to drive activation of T cells <sup>8, 18</sup> and is a positive  
384 regulator of immunity. Its effects in mouse lungs suggests that, just as for type 1 IFN<sup>48</sup> a little bit is good  
385 and required for optimal control of bacterial dissemination but too much completely limits dissemination  
386 and hampers induction and expression of protective immunity.



387    Our data demonstrate that determining the underlying mechanisms whereby the alternative splice variant  
388    of IL-12R $\beta$ 1 impacts TB immunity in both mouse and man should be pursued. The data also support  
389    further investigation into the best use of the transcriptional  $\Delta$ TM-IL-12R $\beta$ 1 signal in defining the  
390    heterogeneity of latent TB infection.

391 **Figure Legends**

392 **Figure 1 Mice susceptible to Mtb infection express high levels of  $\Delta$ TM-IL-12R $\beta$ 1 and limit early**  
393 **dissemination from the lung to the periphery.** Mice were infected using an aerosol chamber capable  
394 of reproducibly delivering approximately 75 colony forming units to each mouse. Mice were housed for  
395 15 days after challenge and then the organs plated for determination of colony forming units (CFU) (Fig  
396 1A) and the copy number of mRNA for the full length IL-12R $\beta$ 1 (FL-IL-12R $\beta$ 1) and the alternative splice  
397 variant  $\Delta$ TM-IL-12R $\beta$ 1 determined by quantitative RT-PCR (Fig 1B). All data points are shown from 2  
398 independent experiments (Fig 1A) or one data set representative of two total experiments (Fig 1B).  
399 Statistical significance was determined using one way ANOVA comparing all groups; n = 8 per group (Fig  
400 1A) and n= 4 per group repeated twice (Fig 1B). \*P<0.05, \*\*P<0.01, \*\*\*P<0.001.

401 **Figure 2  $\Delta$ TM-IL-12R $\beta$ 1 is expressed by lymphoid and myeloid human cells and its absence in**  
402 **CD11c or CD4 expressing cells compromises control of dissemination in mice.** Human myeloid  
403 derived dendritic cells were generated from anonymous blood donors and exposed to live Mtb for 24  
404 hours. RNA was extracted over the time course and analyzed for the copy number of mRNA for the full  
405 length IL-12R $\beta$ 1 (FL-IL-12R $\beta$ 1) and the alternative splice variant  $\Delta$ TM-IL-12R $\beta$ 1 by quantitative RT-PCR.  
406 The ratio of  $\Delta$ TM-IL-12R $\beta$ 1 to FL-IL-12R $\beta$ 1 was determined for each donor and the data points represent  
407 the mean of 4-7 values per time point (Fig 2A). Array data from GSE19443 was analyzed for expression  
408 of the  $\Delta$ TM-IL-12R $\beta$ 1 in cells purified from the blood of healthy controls (Cont) and TB patients (PTB).  
409 Data points are all shown with an n=4-7, the difference between the means was determined by Students  
410 *t* test, \* P<0.05 (Fig 2B). Mice either intact (B6KI) lacking the ability to generate the  $\Delta$ TM-IL-12R $\beta$ 1 in  
411 either CD11c (CD11cCre) or CD4 (CD4Cre) expressing cells were infected with Mtb and the bacterial  
412 burden determined at day 15 as described for Fig 1. All data points are shown for 2 independent  
413 experiments, n=8, differences between the mean were determined by ANOVA with all columns being  
414 compared. \*P<0.05, \*\*P<0.01, \*\*\*P<0.001 (Fig 2C).

415 **Figure 3. The majority of the IL-12R $\beta$ 1 signal seen in microarray data is derived from the  $\Delta$ TM-IL-**  
416 **12R $\beta$ 1 specific probe.** Raw data was manually curated and the signal for each probe analyzed

417 separately for each of 4 microarray data sets. The raw fluorescent intensity for each sample and different  
418 IL-12R $\beta$ 1 isoform specific probe is shown. The probe intensity for the FL-IL-12R $\beta$ 1 was not considered  
419 to be significant for the majority of samples and over all of the data sets whereas the signal from the  
420 probe specific for the  $\Delta$ TM-IL-12R $\beta$ 1 was significantly expressed in all samples.

421 **Figure 4. Expression of  $\Delta$ TM-IL-12R $\beta$ 1 in blood associates with active pulmonary TB and is**  
422 **variably associated with latent TB.** Microarray data from publically available databases was analyzed  
423 for the signal specific for  $\Delta$ TM-IL-12R $\beta$ 1 (Fig 4A). All data points are shown and the differences between  
424 the means of the  $\Delta$ TM-IL-12R $\beta$ 1 signal for each group determined by ANOVA with Tukey's multiple  
425 comparison, n=6-31, \*P<0.05, \*\*P<0.01, \*\*\*P<0.001. RNA-Seq data sets from a UK cohort was analyzed  
426 for expression of the  $\Delta$ TM-IL-12R $\beta$ 1 (Fig 4B) (all data points are shown with known group outliers shown  
427 as open symbols) and was discriminatory for controls versus both LTB and PTB, using ANOVA with  
428 Tukey's multiple comparison, n=12-21, \*P<0.05, \*\*P<0.01. RNA was taken from a new cohort in China  
429 and analyzed for expression of all IL-12R $\beta$ 1 transcripts and was shown to discriminate between controls  
430 and LTB and PTB, between LTB and PTB and between PTB and pneumonia, using ANOVA with Tukey's  
431 multiple comparison, all data points are shown, n=20, \*P<0.05, \*\*\*P<0.001.

432 **Figure 5. Expression of  $\Delta$ TM-IL-12R $\beta$ 1 in blood associates drug treatment in areas of low to**  
433 **moderate infection pressure but fails in areas where infection pressure is high.** Publically available  
434 array data was analyzed for the expression of  $\Delta$ TM-IL-12R $\beta$ 1 in the blood of TB-infected individuals  
435 undergoing drug treatment. All data points are shown and the ability of the signal to differentiate between  
436 pretreatment and a short and longer period post treatment determined. Paired *t* test was used to compare  
437 values at 0 and 6 or 8 week and 0 and 26 or 52 weeks for each patient. In the UK and China (top graphs)  
438 significant differences in the means were observed after treatment whereas no discernable effect could  
439 be seen in the South African cohorts undergoing treatment, n=7-27 P<0.05, \*\*P<0.01.

440

441

442 **References**

- 443 1. WHO. Global Tuberculosis Report. Switzerland: World Health Organization; 2017.
- 444
- 445 2. Dye C, Glaziou P, Floyd K, Raviglione M. Prospects for tuberculosis elimination. *Annu Rev Public Health*
- 446 2013, **34**: 271-286.
- 447
- 448 3. Barry CE, Boshoff HI, Dartois V, Dick T, Ehrh S, Flynn J, *et al.* The spectrum of latent tuberculosis: rethinking
- 449 the biology and intervention strategies. *Nat Rev Micro* 2009, **7**(12): 845-855.
- 450
- 451 4. Boisson-Dupuis S, Bustamante J, El-Baghdadi J, Camcioglu Y, Parvaneh N, El Azbaoui S, *et al.* Inherited and
- 452 acquired immunodeficiencies underlying tuberculosis in childhood. *Immunol Rev* 2015, **264**(1): 103-120.
- 453
- 454 5. de Beaucoudrey L, Samarina A, Bustamante J, Cobat A, Boisson-Dupuis S, Feinberg J, *et al.* Revisiting
- 455 human IL-12R $\beta$ 1 deficiency: a survey of 141 patients from 30 countries. *Medicine* 2010, **89**: 381-402.
- 456
- 457 6. Watford W, Hissong B, Bream J, Kanno Y, Muul L, O'Shea J. Signaling by IL-12 and IL-23 and the
- 458 immunoregulatory roles of STAT4. *Immunol Rev* 2004, **202**: 139-156.
- 459
- 460 7. Khader S, Partida-Sanchez S, Bell G, Jelley-Gibbs D, Swain S, Pearl J, *et al.* Interleukin 12p40 is required for
- 461 dendritic cell migration and T cell priming after *Mycobacterium tuberculosis* infection. *J Exp Med* 2006,
- 462 **203**: 1805-1815.
- 463
- 464 8. Robinson R, Khader S, Martino C, Fountain J, Teixeira-Coelho M, Pearl J, *et al.* *Mycobacterium tuberculosis*
- 465 infection induces il12rb1 splicing to generate a novel IL-12R $\beta$ 1 isoform that enhances DC migration. *J Exp*
- 466 *Med* 2010, **207**: 591-605.
- 467
- 468 9. Cooper AM. Cell mediated immune responses in tuberculosis. *Annu Rev Immunol* 2009, **27**: 393-422.
- 469
- 470 10. Orme I, Robinson R, Cooper A. The balance between protective and pathogenic immune responses in the
- 471 TB infected lung. *Nat Immunol* 2015, **16**: 57-63.
- 472
- 473 11. Robinson R, Orme I, Cooper A. The onset of adaptive immunity in the mouse model of tuberculosis and
- 474 the factors which compromise its expression. *Immunol Rev* 2015, **264**: 46-59.
- 475
- 476 12. Chackerian A, Alt J, Perera T, Dascher C, Behar S. Dissemination of *Mycobacterium tuberculosis* is
- 477 influenced by host factors and precedes the initiation of T-cell immunity. *Infect Immun* 2002, **70**: 4501-
- 478 4509.

479

- 480 13. Pearl JE, Torrado E, Tighe M, Fountain JJ, Solache A, Strutt T, *et al.* Nitric oxide inhibits the accumulation  
481 of CD4<sup>+</sup>CD44<sup>hi</sup>Tbet<sup>+</sup>CD69<sup>lo</sup> T cells in mycobacterial infection. *Eur J Immunol* 2012, **42**: 3267-3279.
- 482
- 483 14. Chua AO, Wilkinson VL, Presky DH, Gubler U. Cloning and characterization of a mouse IL-12 receptor-beta  
484 component. *J Immunol* 1995, **155**: 4286-4294.
- 485
- 486 15. Ray AA, Fountain JJ, Miller HE, Cooper AM, Robinson RT. IL12Rbeta1DeltaTM is a secreted product of  
487 il12rb1 that promotes control of extra-pulmonary tuberculosis. *Infect Immun* 2015, **83**: 1230-1213.
- 488
- 489 16. Ford NR, Miller HE, Reeme AE, Waukau J, Bengtson C, Routes JM, *et al.* Inflammatory signals direct  
490 expression of human IL12RB1 into multiple distinct isoforms. *J Immunol* 2012, **189**(9): 4684-4694.
- 491
- 492 17. Robinson RT. IL12Rbeta1: the cytokine receptor that we used to know. *Cytokine* 2015, **71**(2): 348-359.
- 493
- 494 18. Reeme A, Claeys T, Aggarwal P, Turner A, Routes J, Broeckel U, *et al.* Human IL12RB1 expression is allele-  
495 biased and produces a novel IL12 response regulator. *Genes Immunit* 2018, **in press**.
- 496
- 497 19. Ramasamy A, Mondry A, Holmes CC, Altman DG. Key issues in conducting a meta-analysis of gene  
498 expression microarray datasets. *PLoS Med* 2008, **5**(9): e184.
- 499
- 500 20. Voce DJ, Schmitt AM, Uppal A, McNerney ME, Bernal GM, Cahill KE, *et al.* Nfkb1 is a haploinsufficient DNA  
501 damage-specific tumor suppressor. *Oncogene* 2015, **34**(21): 2807-2813.
- 502
- 503 21. Mondanelli G, Bianchi R, Pallotta MT, Orabona C, Albin E, Iacono A, *et al.* A Relay Pathway between  
504 Arginine and Tryptophan Metabolism Confers Immunosuppressive Properties on Dendritic Cells.  
505 *Immunity* 2017, **46**(2): 233-244.
- 506
- 507 22. Tian S, Krueger JG, Li K, Jabbari A, Brodmerkel C, Lowes MA, *et al.* Meta-analysis derived (MAD)  
508 transcriptome of psoriasis defines the "core" pathogenesis of disease. *PLoS One* 2012, **7**(9): e44274.
- 509
- 510 23. Cliff JM, Kaufmann SH, McShane H, van Helden P, O'Garra A. The human immune response to tuberculosis  
511 and its treatment: a view from the blood. *Immunol Rev* 2015, **264**(1): 88-102.
- 512
- 513 24. Cai Y, Yang Q, Tang Y, Zhang M, Liu H, Zhang G, *et al.* Increased complement C1q level marks active disease  
514 in human tuberculosis. *PLoS One* 2014, **9**(3): e92340.
- 515
- 516 25. Pearl JE, Shabaana AK, Solache A, Gilmartin L, Ghilardi N, deSauvage F, *et al.* IL-27 signaling compromises  
517 control of bacterial growth in mycobacteria-infected mice. *J Immunol* 2004, **173**: 7490-7496.
- 518

- 519 26. Robinson RT, Ray A, Chen X, Cooper A, inventors; Use of an IL12 Receptor-Beta 1 Splice Variant to Diagnose  
520 Active Tuberculosis US. 2014.
- 521
- 522 27. Pashaei E, Guzel E, Ozgurses ME, Demirel G, Aydin N, Ozen M. A Meta-Analysis: Identification of Common  
523 Mir-145 Target Genes that have Similar Behavior in Different GEO Datasets. *PLoS One* 2016, **11**(9):  
524 e0161491.
- 525
- 526 28. Davis S, Meltzer PS. GEOquery: a bridge between the Gene Expression Omnibus (GEO) and BioConductor.  
527 *Bioinformatics* 2007, **23**(14): 1846-1847.
- 528
- 529 29. Du P, Kibbe WA, Lin SM. lumi: a pipeline for processing Illumina microarray. *Bioinformatics* 2008, **24**(13):  
530 1547-1548.
- 531
- 532 30. Singhanian A, Verma R, Graham CM, Lee J, Trang T, Richardsdon M, *et al*. A modular transcriptional signature  
533 identifies phenotypic heterogeneity of human tuberculosis infection. *bioRxiv* 2017.
- 534
- 535 31. Berry MP, Graham CM, McNab FW, Xu Z, Bloch SA, Oni T, *et al*. An interferon-inducible neutrophil-driven  
536 blood transcriptional signature in human tuberculosis. *Nature* 2010, **466**: 973-977.
- 537
- 538 32. Ewels P, Magnusson M, Lundin S, Kaller M. MultiQC: summarize analysis results for multiple tools and  
539 samples in a single report. *Bioinformatics* 2016, **32**(19): 3047-3048.
- 540
- 541 33. Bolger AM, Lohse M, Usadel B. Trimmomatic: a flexible trimmer for Illumina sequence data. *Bioinformatics*  
542 2014, **30**(15): 2114-2120.
- 543
- 544 34. Kim D, Langmead B, Salzberg SL. HISAT: a fast spliced aligner with low memory requirements. *Nat Methods*  
545 2015, **12**(4): 357-360.
- 546
- 547 35. Pertea M, Pertea GM, Antonescu CM, Chang TC, Mendell JT, Salzberg SL. StringTie enables improved  
548 reconstruction of a transcriptome from RNA-seq reads. *Nat Biotechnol* 2015, **33**(3): 290-295.
- 549
- 550 36. Frazee AC, Pertea G, Jaffe AE, Langmead B, Salzberg SL, Leek JT. Ballgown bridges the gap between  
551 transcriptome assembly and expression analysis. *Nat Biotechnol* 2015, **33**(3): 243-246.
- 552
- 553 37. Xia J, Wishart DS. Using MetaboAnalyst 3.0 for Comprehensive Metabolomics Data Analysis. *Curr Protoc*  
554 *Bioinformatics* 2016, **55**: 14 10 11-14 10 91.
- 555
- 556 38. Medina E, North RJ. Resistance ranking of some common inbred mouse strains to *Mycobacterium*  
557 *tuberculosis* and relationship to major histocompatibility complex haplotype and *Nramp1* genotype.  
558 *Immunology* 1998, **93**: 270-274.

- 559  
560 39. Kaforou M, Wright VJ, Oni T, French N, Anderson ST, Bangani N, *et al.* Detection of tuberculosis in HIV-  
561 infected and -uninfected African adults using whole blood RNA expression signatures: a case-control  
562 study. *Plos Medicine* 2013, **10**(10): e1001538.
- 563  
564 40. Ottenhoff TH, Dass RH, Yang N, Zhang MM, Wong HE, Sahiratmadja E, *et al.* Genome-wide expression  
565 profiling identifies type 1 interferon response pathways in active tuberculosis. *PLoS One* 2012, **7**(9):  
566 e45839.
- 567  
568 41. Cliff JM, Lee JS, Constantinou N, Cho JE, Clark TG, Ronacher K, *et al.* Distinct phases of blood gene  
569 expression pattern through tuberculosis treatment reflect modulation of the humoral immune response.  
570 *J Infect Dis* 2013, **207**(1): 18-29.
- 571  
572 42. Reiley W, Calayag M, Wittmer S, Huntington J, Pearl J, Fountain J, *et al.* ESAT-6-specific CD4 T cell  
573 responses to aerosol *Mycobacterium tuberculosis* infection are initiated in mediastinal lymph nodes. *PNAS*  
574 2008, **105**: 10961-10966.
- 575  
576 43. Domingo-Gonzalez R, Prince O, Cooper A, Khader SA. Cytokines and Chemokines in Mycobacterium  
577 tuberculosis Infection. *Microbiol Spectr* 2016, **4**(5).
- 578  
579 44. Mayer-Barber KD, Andrade BB, Barber DL, Hieny S, Feng CG, Caspar P, *et al.* Innate and adaptive  
580 interferons suppress IL-1α and IL-1β production by distinct pulmonary myeloid subsets during  
581 *Mycobacterium tuberculosis* infection. *Immunity* 2011, **35**: 1023-1034.
- 582  
583 45. Mayer-Barber KD, Andrade BB, Oland SD, Amaral EP, Barber DL, Gonzales J, *et al.* Host-directed therapy  
584 of tuberculosis based on interleukin-1 and type I interferon crosstalk. *Nature* 2014, **511**(7507): 99-103.
- 585  
586 46. McNab FW, Ewbank J, Howes A, Moreira-Teixeira L, Martirosyan A, Ghilardi N, *et al.* Type I IFN induces IL-  
587 10 production in an IL-27-independent manner and blocks responsiveness to IFN-γ for production of IL-  
588 12 and bacterial killing in *Mycobacterium tuberculosis*-infected macrophages. *J Immunol* 2014, **193**(7):  
589 3600-3612.
- 590  
591 47. Turner AJ, Aggarwal P, Miller HE, Waukau J, Routes JM, Broeckel U, *et al.* The introduction of RNA-DNA  
592 differences underlies interindividual variation in the human IL12RB1 mRNA repertoire. *Proc Natl Acad Sci*  
593 *U S A* 2015, **112**(50): 15414-15419.
- 594  
595 48. McNab F, Mayer-Barber K, Sher A, Wack A, O'Garra A. Type I interferons in infectious disease. *Nat Rev*  
596 *Immunol* 2015, **15**(2): 87-103.
- 597  
598

Figure 1 Das et al

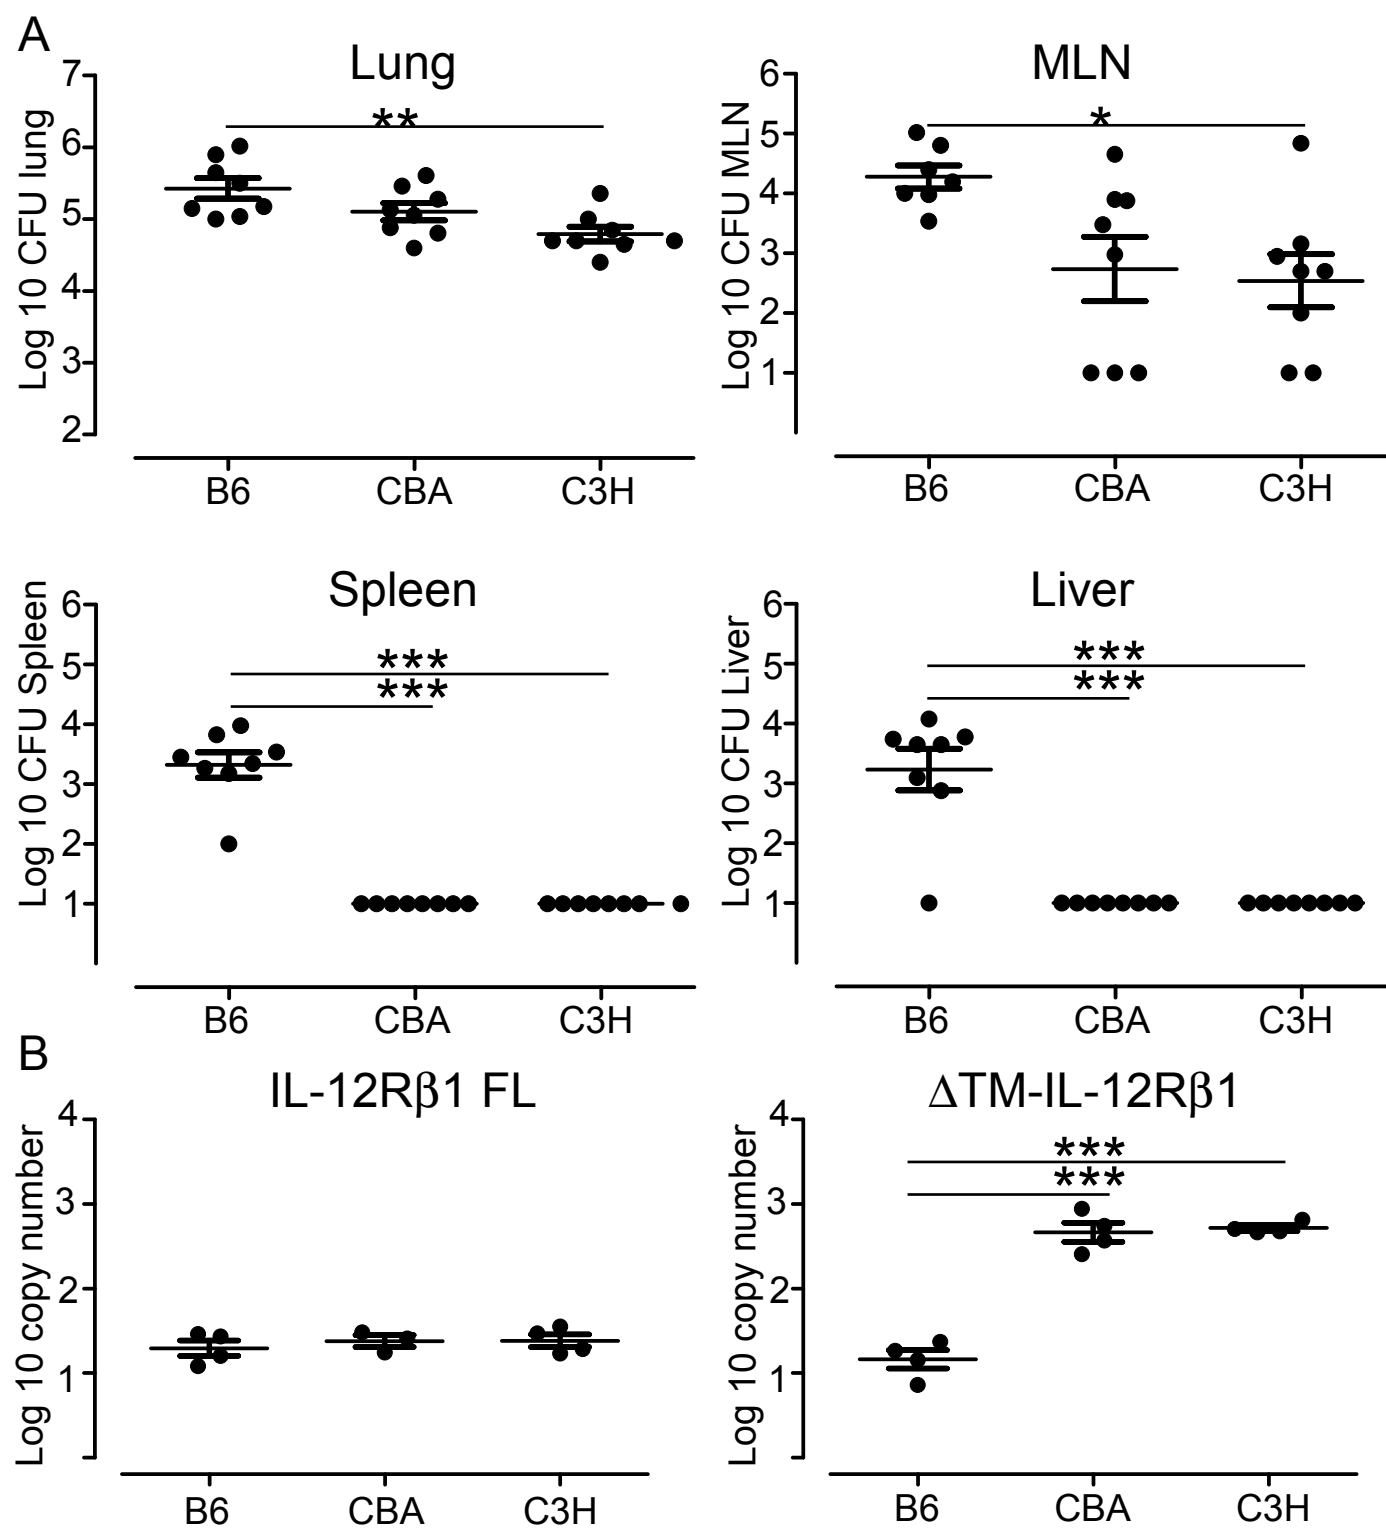



Figure 2 Das et al

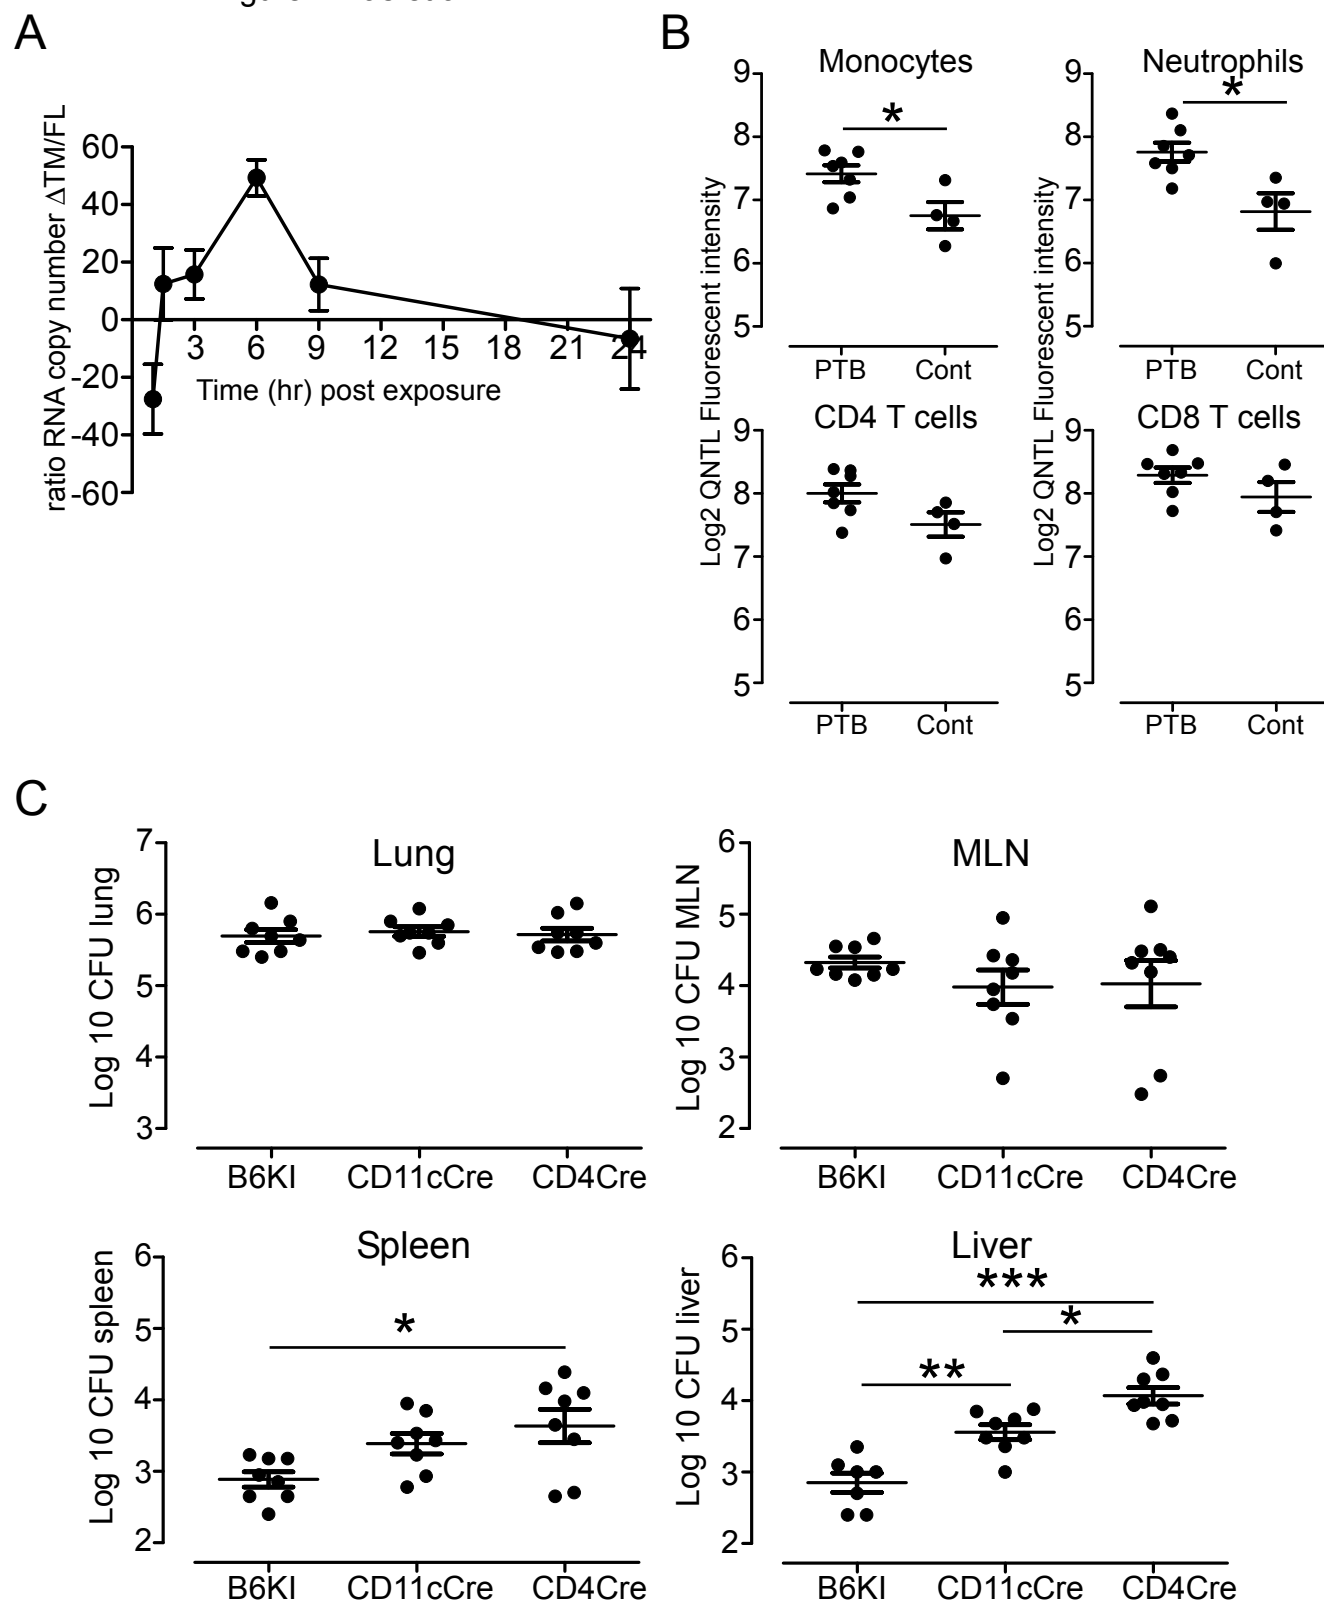

Figure 3 Das et al

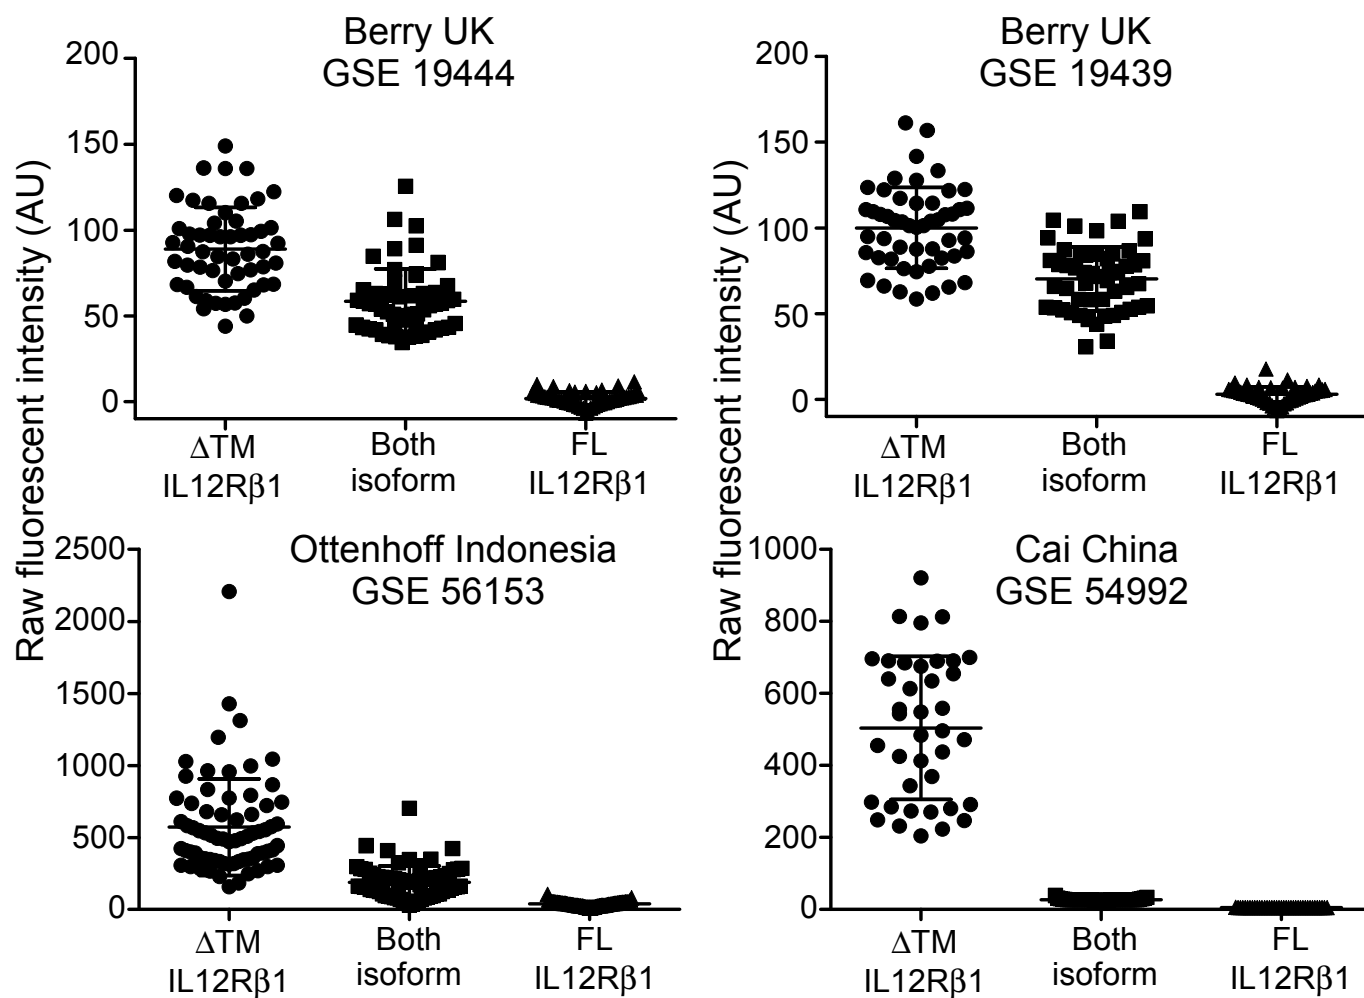

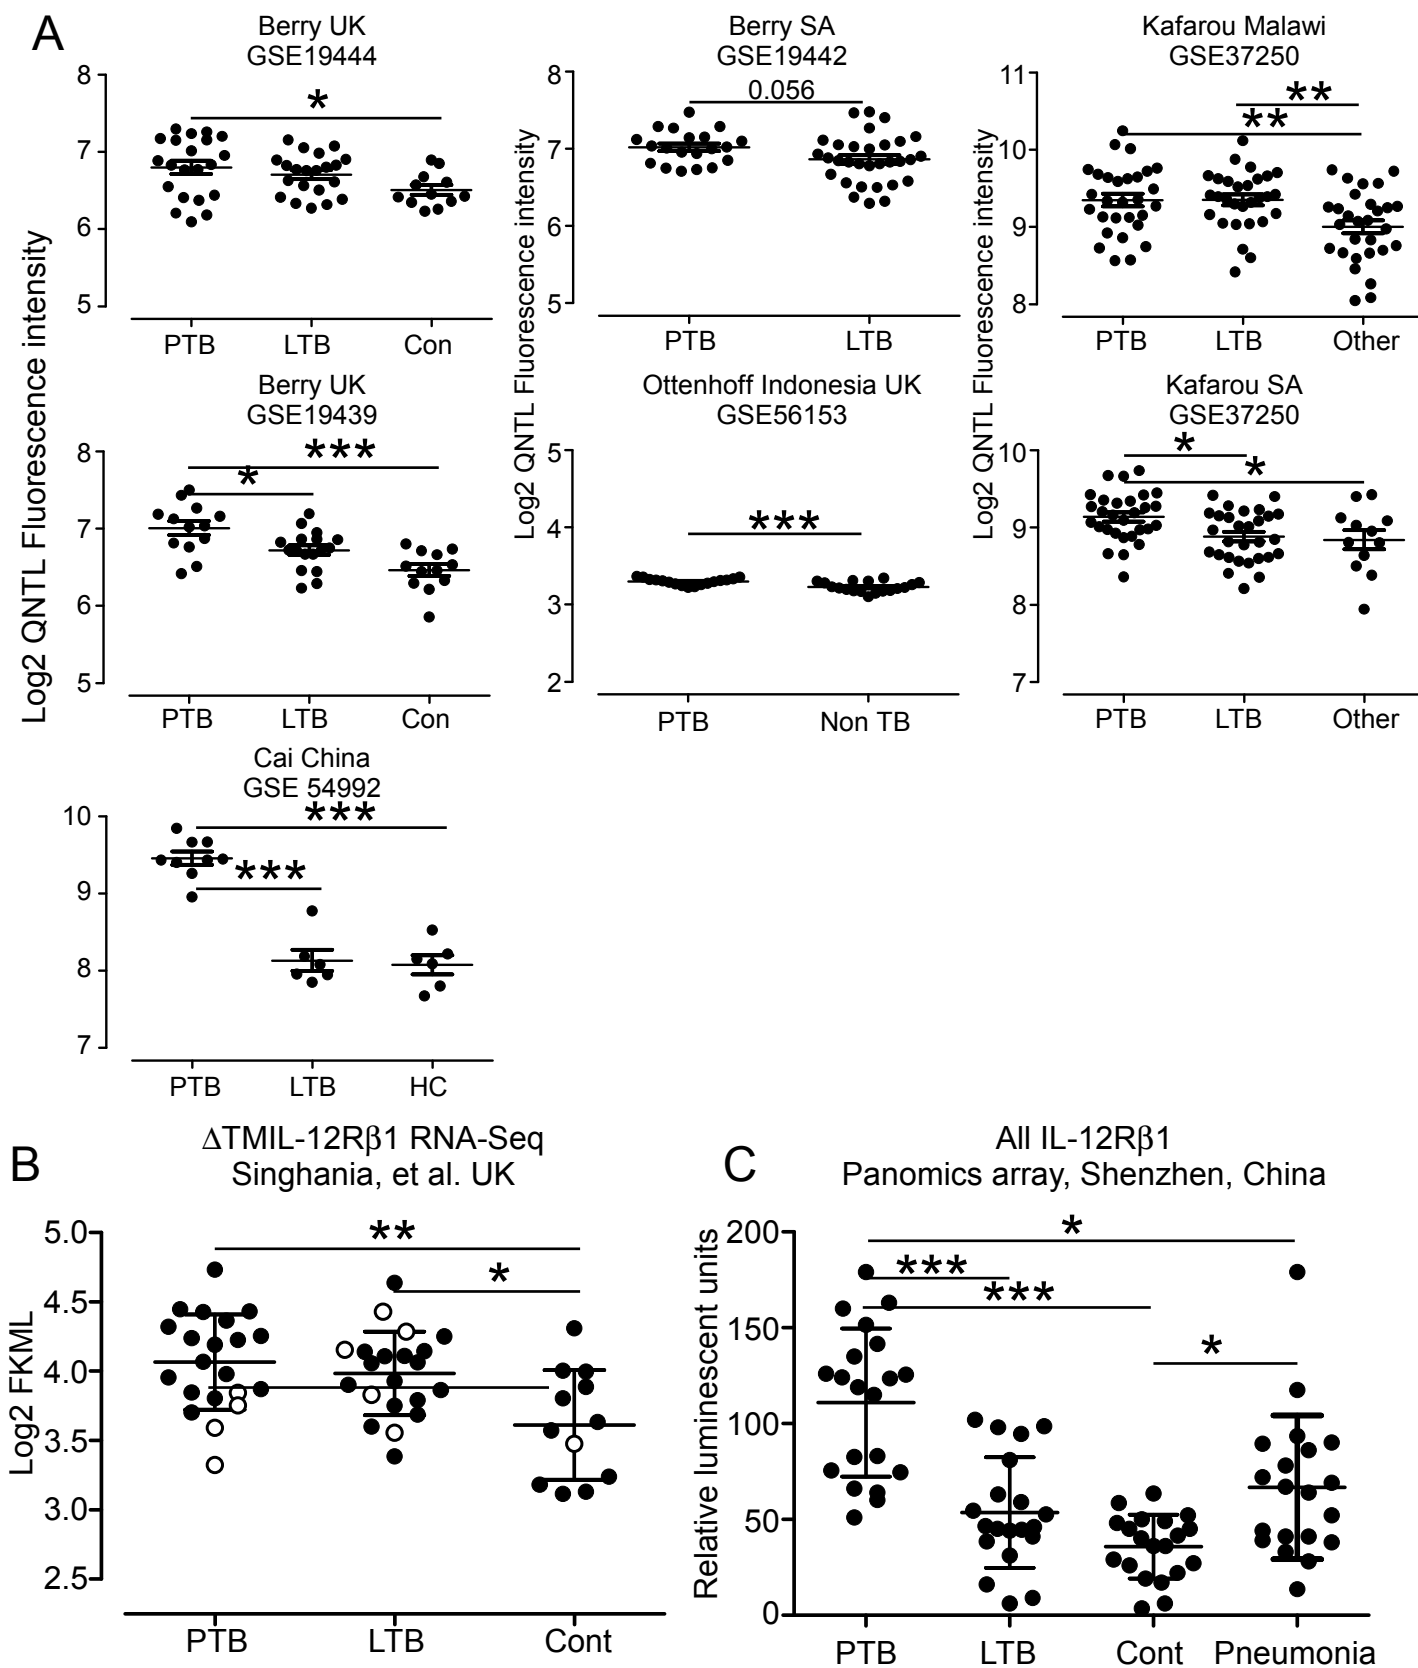

Figure 5 Das et al

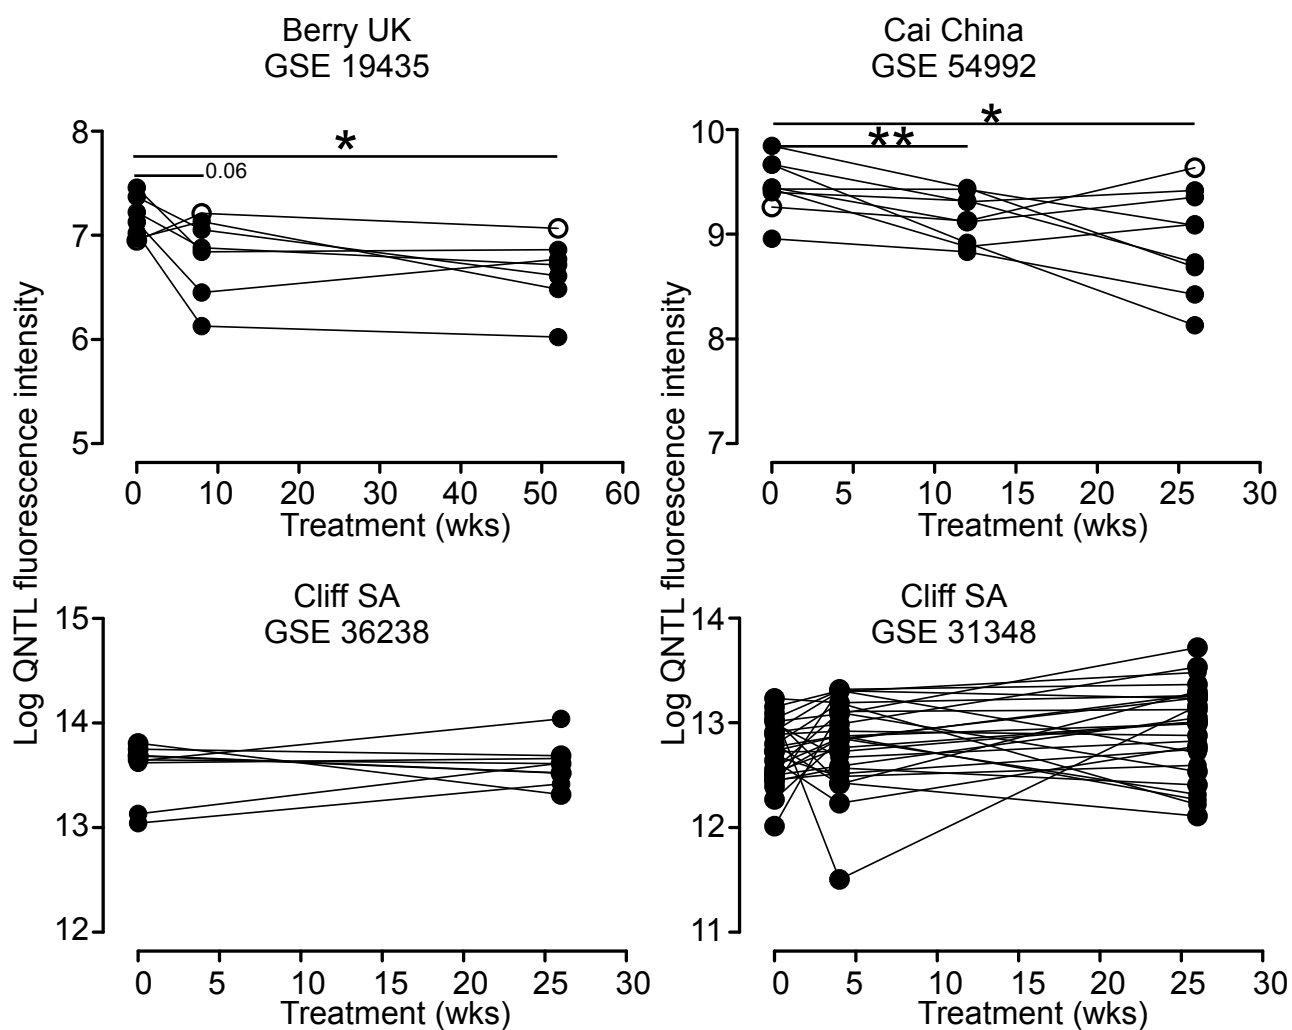

**Table 1:** The demographic characteristics of study population Shenzhen Third Peoples Hospital in Shenzhen, China.

| Study Cohort | n  | Median age in years (range) | Gender (M/F) | AFB-positive    | ELISPOT Positive |
|--------------|----|-----------------------------|--------------|-----------------|------------------|
| TB           | 20 | 38.2 (25.0-58.0)            | 13/7         | 20              | 20               |
| LTBI         | 20 | 31.2 (23.0-56.0)            | 12/8         | ND <sup>1</sup> | 20               |
| HC           | 20 | 28.6 (21.0-48.0)            | 10/10        | ND              | 0                |
| Pneumonia    | 20 | 39.2 (29.0-59.0)            | 12/8         | ND              | ND               |

<sup>1</sup>ND = not done

**Table 2.** Details of the public array data assessed for expression of the  $\Delta$ TM-IL-12R $\beta$ 1

bioRxiv preprint doi: <https://doi.org/10.1101/271627>; this version posted February 26, 2018. The copyright holder for this preprint (which was not certified by peer review) is the author/funder, who has granted bioRxiv a license to display the preprint in perpetuity. It is made available under aCC-BY-NC-ND 4.0 International license.

|    | GEO dataset | Platform                                               | Pathology (no of sample used; Location)                                                                                          | Sample                                                            | Reference                                  |
|----|-------------|--------------------------------------------------------|----------------------------------------------------------------------------------------------------------------------------------|-------------------------------------------------------------------|--------------------------------------------|
| 1  | GSE19444    | GPL6947: Illumina HumanHT-12 V3.0 expression beadchip  | PTB (21; UK)<br>LTB <sup>T&amp;I</sup> (21; UK)<br>CON <sup>T&amp;I</sup> (12;UK)                                                | Whole blood                                                       | Berry et al (2010) Nature 466:973-977      |
| 2  | GSE19443    | GPL6947: Illumina HumanHT-12 V3.0 expression beadchip  | PTB (7; UK)<br>CON <sup>T&amp;I</sup> (4; UK)                                                                                    | Neutrophil, Monocyte, CD4 and CD8 cells purified from whole blood | Berry et al (2010) Nature 466:973-977      |
| 3  | GSE19442    | GPL6947: Illumina HumanHT-12 V3.0 expression beadchip  | PTB (20, SA)<br>LTB <sup>I</sup> (31, SA)                                                                                        | Whole blood                                                       | Berry et al (2010) Nature 466:973-977      |
| 4  | GSE19439    | GPL6947: Illumina HumanHT-12 V3.0 expression beadchip  | PTB (13; UK)<br>LTB <sup>T&amp;I</sup> (17; UK)<br>CON <sup>T&amp;I</sup> (12;UK)                                                | Whole blood                                                       | Berry et al (2010) Nature 466:973-977      |
| 5  | GSE19435    | GPL6947: Illumina HumanHT-12 V3.0 expression beadchip  | PTB (7; UK)<br>PTB_long_2M (7; UK)<br>PTB_long_12M (7; UK)<br>CON <sup>T&amp;I</sup> (12;UK)                                     | Whole blood                                                       | Berry et al (2010) Nature 466:973-977      |
| 6  | GSE37250    | GPL10558: Illumina HumanHT-12 V4.0 expression beadchip | PTB (47; SA)<br>(59; Malawi)<br>LTB <sup>T&amp;I</sup> (50; SA)<br>(36; Malawi)                                                  | Whole blood                                                       | Kaforou et al (2013) PLoS Med 10:e1001538. |
| 7  | GSE56153    | GPL6883: Illumina HumanRef-v3.0 expression beadchip    | PTB (18, Indonesia)<br>TREAT (15; Indonesia)<br>RECO (20; Indonesia)<br>CON <sup>ND</sup> (18; Indonesia)                        | Whole blood                                                       | Ottenhoff et al (2012) PLoS ONE 7: e45839  |
| 8  | GSE54992    | GPL570: Affymetrix Human Genome U133 Plus 2.0 Array    | PTB (9; China)<br>PTB_long_3M (9; China)<br>PTB_long_6M (9; China)<br>LTB <sup>I</sup> (6; China)<br>CON <sup>I</sup> (6; China) | Peripheral blood mononuclear cells                                | Cai et al (2014) PLoS One 9:e92340         |
| 9  | GSE36238    | GPL570: Affymetrix Human Genome U133 Plus 2.0 Array    | PTB (27; SA)<br>PTB_long_6M (27; SA)                                                                                             | Whole blood                                                       | Cliff et al (2013) J Infect Dis 207:18-29. |
| 10 | GSE31348    | GPL570: Affymetrix Human Genome U133 Plus 2.0 Array    | PTB (27; SA)<br>PTB_long_1W (27; SA)<br>PTB_long_2W (27; SA)<br>PTB_long_1M (27; SA)<br>PTB_long_6M (27; SA)                     | Whole blood                                                       | Cliff et al (2013) J Infect Dis 207:18-29. |

PTB: Pulmonary TB

LTB: Latent TB diagnosed with tuberculin skin test (TST) and IGRA (LTB<sup>T&I</sup>) or Latent TB diagnosed with IGRA only (LTB<sup>I</sup>).

CON: Healthy control with negative latent infection diagnosed with tuberculin skin test (TST) and IGRA (CON<sup>T&I</sup>) or IGRA only (CON<sup>I</sup>) or latency not determined (CON<sup>ND</sup>)

PTB long: Pulmonary TB subject undergoing treatment. Samples collected at 1week (1W), 2 weeks (2W), 1 month (1M), 2 months (2M), 6 months (6M) and 12 months (12M).

bioRxiv preprint doi: <https://doi.org/10.1101/271627>; this version posted February 26, 2018. The copyright holder for this preprint (which was not certified by peer review) is the author/funder, who has granted bioRxiv a license to display the preprint in perpetuity. It is made available under a [CC-BY-NC-ND 4.0 International license](#).

**Table 3.** The signal from probes specific for the  $\Delta$ TM-IL-12R $\beta$ 1 isoform in microarray data sets correlates with the majority of signal seen for all of the IL-12R $\beta$ 1 targeted probes.

| Array data set | Correlation coefficient between the signal for probes specific for: |                                                               |                                             |
|----------------|---------------------------------------------------------------------|---------------------------------------------------------------|---------------------------------------------|
|                | $\Delta$ TM-IL-12R $\beta$ 1 and all probes                         | $\Delta$ TM-IL-12R $\beta$ 1 and IL-12R $\beta$ 1 full-length | IL-12R $\beta$ 1 full-length and all probes |
| GSE19444       | 0.66 <sup>1</sup>                                                   | 0.43                                                          | 0.32                                        |
| GSE19442       | 0.44                                                                | -0.16                                                         | -0.09                                       |
| GSE56153       | 0.89                                                                | 0.67                                                          | 0.68                                        |
| GSE54992       | 0.51                                                                | 0.16                                                          | 0.05                                        |

<sup>1</sup> Normalised fluorescent intensities of probes specific for different isoforms of IL-12R $\beta$ 1 were used to prepare a matrix and the Pearson correlation coefficient was calculated using online tool Metaboanalyst 3.0.



**Table 4.** Discriminatory potential of IL-12-related variables for identifying disease groups. Variables which include the signal from the  $\Delta$ TM-IL-12R $\beta$ 1 occur as one of the top 3 variables IL-12-related discriminator in each comparison. The top 3 variables based on area under curve (AUC) for each comparison is shown.

|                 | PTB CON               | AUC  | p-value | LTB PTB               | AUC  | p-value | LTB CON               | AUC  | p-value |
|-----------------|-----------------------|------|---------|-----------------------|------|---------|-----------------------|------|---------|
| <b>GSE19444</b> | ( $\Delta$ TM +All)/2 | 0.73 | 0.01    | $\Delta$ TM           | 0.60 | 0.37    | ( $\Delta$ TM +All)/2 | 0.72 | 0.03    |
|                 | All                   | 0.72 | 0.02    | IL12a                 | 0.58 | 0.31    | $\Delta$ TM           | 0.71 | 0.04    |
|                 | $\Delta$ TM           | 0.71 | 0.02    | ( $\Delta$ TM +All)/2 | 0.57 | 0.38    | All                   | 0.70 | 0.06    |
| <b>GSE19439</b> | ( $\Delta$ TM +All)/2 | 0.93 | 0.00    | $\Delta$ TM           | 0.76 | 0.01    | $\Delta$ TM /Full     | 0.88 | 0.00    |
|                 | $\Delta$ TM           | 0.90 | 0.00    | ( $\Delta$ TM +All)/2 | 0.74 | 0.02    | Full                  | 0.78 | 0.02    |
|                 | $\Delta$ TM /Full     | 0.87 | 0.00    | $\Delta$ TM/IL12Rb2   | 0.74 | 0.01    | $\Delta$ TM           | 0.76 | 0.01    |
| <b>GSE54992</b> | $\Delta$ TM           | 1.00 | 0.00    | $\Delta$ TM           | 1.00 | 0.00    | IL12Rb2               | 0.78 | 0.13    |
|                 | ( $\Delta$ TM +All)/2 | 1.00 | 0.00    | avg_dTM_all3          | 1.00 | 0.00    | $\Delta$ TM /IL12Rb2  | 0.75 | 0.13    |
|                 | $\Delta$ TM /Full     | 1.00 | 0.00    | $\Delta$ TM /Full     | 1.00 | 0.00    | IL12b                 | 0.72 | 0.18    |

$\Delta$ TM: Probe intensity for  $\Delta$ TM-IL-12R $\beta$ 1 isoform,

All: Intensity of probe specific for both isoforms of 12R $\beta$ 1;

Full: Intensity of probe specific for full length 12R $\beta$ 1 isoform.
